# Supplementary material for: Decreased glutathione and low catalase activity contribute to oxidative stress in children with α-1 antitrypsin deficiency: Table 1
Source: HighWire-hosted journal article supplement (doi:10.1136/thoraxjnl-2014-205898), 2014-07-15
Supplement: thoraxjnl-2014-205898supp_table.pdf [file thoraxjnl-2014-205898supp_table.pdf]

**Table S1.** Demographic and clinical characteristics in AATD and control children

| Variable                           | Control<br>(n = 38)    | Low risk<br>(n = 15)   | Intermediate<br>risk<br>(n = 28) | High risk<br>(n = 8)   | p-value           |
|------------------------------------|------------------------|------------------------|----------------------------------|------------------------|-------------------|
| <b>Age (median;<br/>range)</b>     | 9<br>(4-12)            | 11<br>(4-14)           | 9<br>(4-12)                      | 9<br>(6-14)            | 0.182             |
| <b>Gender<br/>M/F (n, %)</b>       | 25/17, 60/40           | 11/4, 73/27            | 17/11, 61/39                     | 6/3, 67/33             | 0.691             |
| <b>AAT (mg/dl)</b>                 | 139.4<br>(161.0-119.1) | 119.5<br>(127.5-99.0)  | 82.0<br>(95.0-67.8)              | 25.4<br>(34.2-22.0)    | <b>&lt; 0.001</b> |
| <b>BMI (Kg/m<sup>2</sup>)</b>      | 18.22 ± 3.77           | 19.21 ± 2.55           | 19.17 ± 3.45                     | 19.50 ± 3.31           | 0.536             |
| <b>FEV<sub>1</sub> (%)</b>         | 91.90<br>(88.0-105.4)  | 100.2<br>(91.45-109.3) | 103.9<br>(96.20-120.4)           | 101.0<br>(100.8-116.0) | 0.620             |
| <b>FVC (%)</b>                     | 100.0<br>(89.8-108.1)  | 100.0<br>(89.90-114.5) | 108.4<br>(87.6-119.0)            | 107.0<br>(106.9-108.0) | 0.951             |
| <b>FEV<sub>1</sub>/FVC<br/>(%)</b> | 92.0<br>(78.0-102.0)   | 85.0<br>(76.4-107.7)   | 99.40<br>(88.8-109.7)            | 97.2<br>(83.0-111)     | 0.432             |
| <b>FEF<sub>25-75</sub> (%)</b>     | 71.8<br>(56.7-90.2)    | 80.5<br>(59.1-97.3)    | 104.7<br>(98.6-108.3)            | 96.5<br>(84.1-97.0)    | 0.095             |
| <b>AST (U/L)</b>                   | 28.00<br>(24.50-37.50) | 26.00<br>(22.75-30.75) | 28.00<br>(25.00-37.00)           | 26.00<br>(25.00-29.00) | 0.389             |
| <b>ALT (U/L)</b>                   | 19.00<br>(18.00-23.50) | 18.00<br>(16.00-20.00) | 20.50<br>(17.25-25.00)           | 24.00<br>(19.00-32.00) | 0.113             |
| <b>GGT (U/L)</b>                   | 14.00<br>(12.00-17.25) | 15.00<br>(11.75-16.25) | 16.00<br>(14.00-18.00)           | 18.00<br>(17.00-20.00) | 0.055             |

AAT, Alpha-1 antitrypsin; BMI, body mass index; AST, aspartate aminotransferase; ALT, alanine aminotransferase; GGT, gammaglutamyl-transferase; FEV<sub>1</sub>, forced expiratory volume in 1 s; FVC, forced vital capacity; FEF<sub>25-75</sub>, forced expiratory flow 25–75%. Data are expressed as median and interquartile range (IQR). Statistic significance after application of Kruskal-Wallis test. Comparison of proportions was performed by chi-square test. P-values lower than 0.05 were statistically significant (labelled in bold).
